# Supplementary material for: Phosphazene-catalyzed oxa-Michael addition click polymerization
Source: Royal Society of Chemistry journal article supplement (doi:10.1039/c8py01089g), 2018-01-01
Supplement: c8py01089g1.pdf [file c8py01089g1.pdf]

# Phosphazene-Catalyzed Oxa-Michael Addition Click Polymerization

*Hongjun Yang,<sup>a</sup> YongKang Zuo,<sup>a</sup> Jiadong Zhang,<sup>a</sup> Yiye Song,<sup>b</sup> Wenyan Huang,<sup>a</sup>  
Xiaoqiang Xue,<sup>a</sup> Qiming Jiang,<sup>a</sup> Aibin Sun<sup>a</sup> and Bibiao Jiang<sup>a,b</sup> \**

<sup>a</sup> Jiangsu Key Laboratory of Environmentally Friendly Polymeric Materials, School of Materials Science and Engineering, Jiangsu Collaborative Innovation Centre of Photovoltaic Science and Engineering, Changzhou University, Changzhou, Jiangsu, P. R. China 213164.

<sup>b</sup> Changzhou University Huaidei College, Jingjiang, Jiangsu, P. R. China 214500.

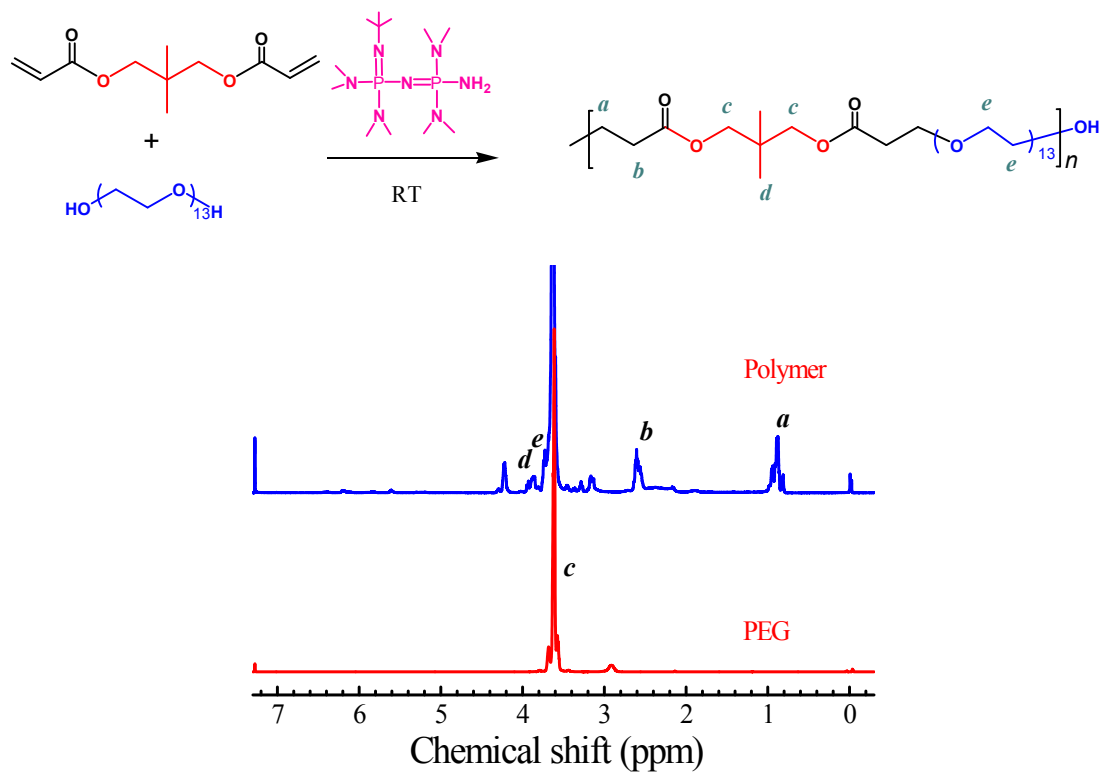

**Figure S1.** <sup>1</sup>H-NMR spectra of PEG-600 and the resulting copolymer by the reaction of PEG600 and NGD.

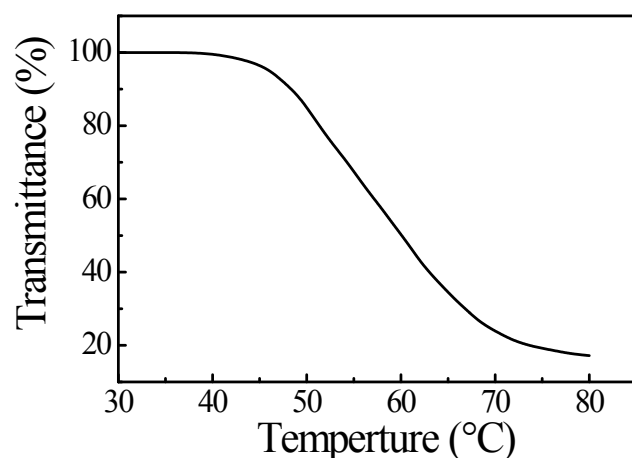

**Figure S2.** LCST of the resulting copolymer by the reaction of PEG600 and NGD.

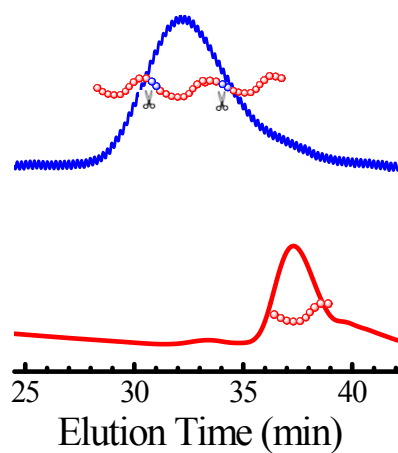

**Figure S3.** GPC curves of the resulting copolymer by the reaction of PEG600 and NGD (green) and the oligomer after hydrolyzed (red).

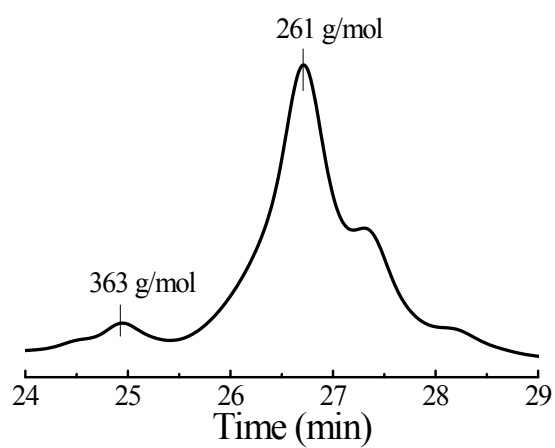

**Figure S4.** GPC curve of the resulting oligomer from the reaction of acrylate and a tertiary alcohol.
